# Supplementary material for: Computer-Aided Histopathological Characterisation of Endometriosis Lesions
Source: MDPI journal article supplement (doi:10.3390/jpm12091519), 2022-09-16
Supplement: s1 [file s1]

## Supplementary Figures and Tables

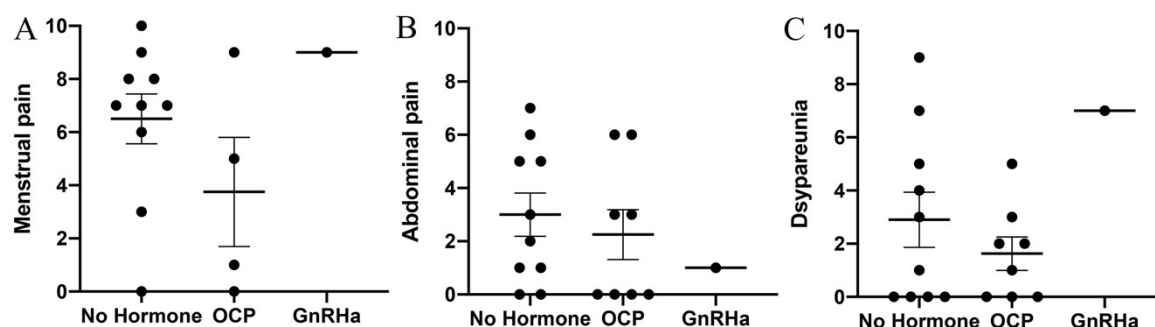

**Supplementary Figure S1. Relationship between pain and hormonal treatment.** Comparison of (A) menstrual pain, (B) abdominal pain, and (C) dyspareunia scores between samples derived from women who were not taking hormonal treatments compared to samples from women who were taking hormonal treatments split into oral contraceptive pill (OCP) and gonadotropin-releasing hormonal analogue (GnRHa), which showed a general decrease in pain compared to women who were not taking hormonal treatments (no hormone), although the sample size was not sufficient for this to be accurately analysed statistically.

**Supplementary Table S1.** Parameters used by object classifier to identify cell type.

### List of Parameters Used for Machine-Based Cell Detection

- 1 Centroid X  $\mu\text{m}$
- 2 Centroid Y  $\mu\text{m}$
- 3 Nucleus: Area
- 4 Nucleus: Perimeter
- 5 Nucleus: Circularity
- 6 Nucleus: Max calliper
- 7 Nucleus: Min calliper
- 8 Nucleus: Eccentricity
- 9 Nucleus: Haematoxylin OD mean
- 10 Nucleus: Haematoxylin OD sum
- 11 Nucleus: Haematoxylin OD std dev
- 12 Nucleus: Haematoxylin OD max
- 13 Nucleus: Haematoxylin OD min
- 14 Nucleus: Haematoxylin OD range
- 15 Nucleus: DAB OD mean
- 16 Nucleus: DAB OD sum
- 17 Nucleus: DAB OD std dev
- 18 Nucleus: DAB OD max
- 19 Nucleus: DAB OD min
- 20 Nucleus: DAB OD range
- 21 Cell: Area
- 22 Cell: Perimeter
- 23 Cell: Circularity
- 24 Cell: Max calliper
- 25 Cell: Min calliper
- 26 Cell: Eccentricity

---

27 Cell: Haematoxylin OD mean  
28 Cell: Haematoxylin OD std dev  
29 Cell: Haematoxylin OD max  
30 Cell: Haematoxylin OD min  
31 Cell: DAB OD mean  
32 Cell: DAB OD std dev  
33 Cell: DAB OD max  
34 Cell: DAB OD min  
35 Cytoplasm: Haematoxylin OD mean  
36 Cytoplasm: Haematoxylin OD std dev  
37 Cytoplasm: Haematoxylin OD max  
38 Cytoplasm: Haematoxylin OD min  
39 Cytoplasm: DAB OD mean  
40 Cytoplasm: DAB OD std dev  
41 Cytoplasm: DAB OD max  
42 Cytoplasm: DAB OD min  
43 Nucleus/Cell area ratio

---
